# Supplementary material
Source: ML conference proceedings conference paper supplement (https://aclanthology.org/N19-1355)
Supplement: Software [file N19-1355.Software.pdf]

We make all our code and models for paper “AUTOSEM: Automatic Task Selection and Mixing in Multi-Task Learning” publicly available at: <https://github.com/HanGuo97/AutoSeM> (see footnote1 of paper pdf).
